# Supplementary material for: Combined Effects of Rosuvastatin and Exercise on Gene Expression of Key Molecules Involved in Cholesterol Metabolism in Ovariectomized Rats
Source: PubMed Central journal article supplement (PMC4956224; doi:10.1371/journal.pone.0159550), 2016-07-21
Supplement: pone.0159550.s001.pdf [file pone.0159550.s001.pdf]

## S1 Fig. Supplementary figures

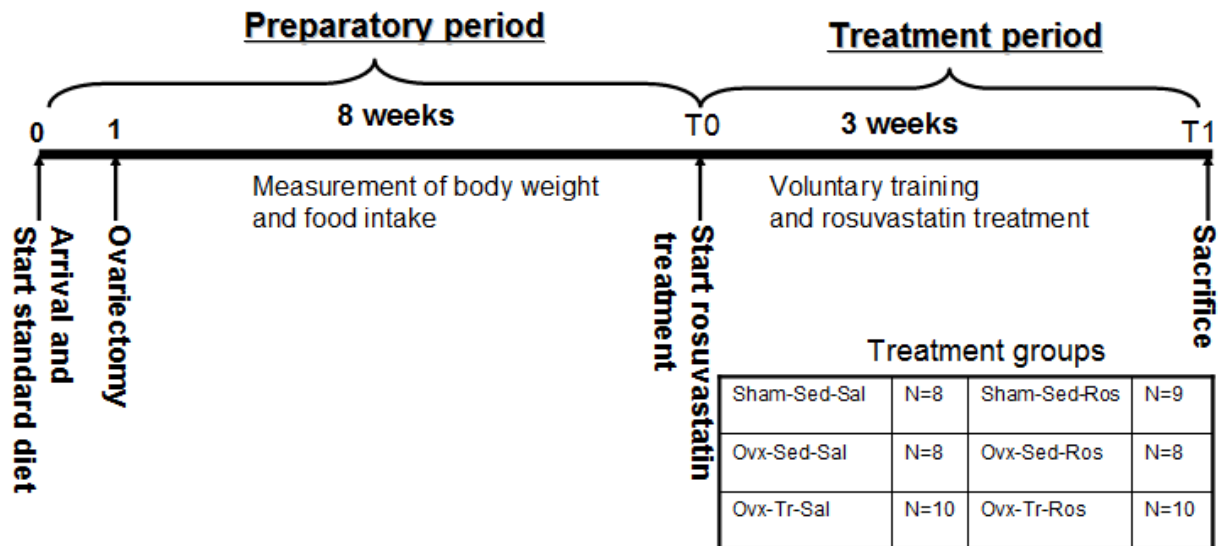

**S1A Fig. Experimental protocol.** **0**, arrival of rats in the animal room. **1**, one week after arrival, rats were ovariectomized (Ovx) or Sham operated (Sham). **Preparatory period**, Ovx and Sham rats were kept without any interventions for eight weeks in order to develop metabolic disorders leading to hypercholesterolemia. **T0**, end of the preparatory period, and all rats were transferred in running wheel cages for three weeks of voluntary exercise and rosuvastatin (Ros) treatment. **T1**, end of experiment, all rats were sacrificed. Six groups were formed as follow: **Sham-Sed-Sal**, sham sedentary rats treated with saline; **Sham-Sed-Ros**, sham sedentary rats treated with Ros; **Ovx-Sed-Sal**, Ovx sedentary rats treated with saline; **Ovx-Sed-Ros**, Ovx sedentary rats treated with Ros; **Ovx-Tr-Sal**, Ovx trained rats treated with saline; and **Ovx-Tr-Ros**, Ovx trained rats treated with Ros.

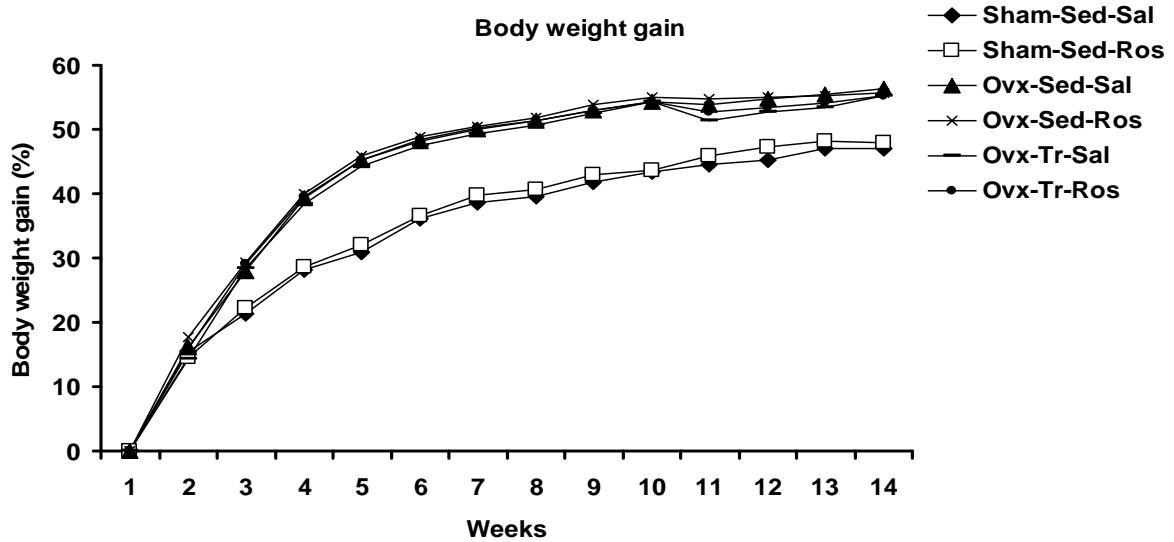

**S1B Fig. Body weight gain during the experiment.** Body weight significantly increased in all Ovx groups compared to Sham groups. There was no difference in body weight between Ovx groups or between Sham groups. **Sham-Sed-Sal**, sham sedentary rats treated with saline; **Sham-Sed-Ros**, sham sedentary rats treated with Ros; **Ovx-Sed-Sal**, Ovx sedentary rats treated with saline **Ovx-Sed-Ros**, Ovx sedentary rats treated with Ros; **Ovx-Tr-Sal**, Ovx trained rats treated with saline; and **Ovx-Tr-Ros**, Ovx trained rats treated with Ros.

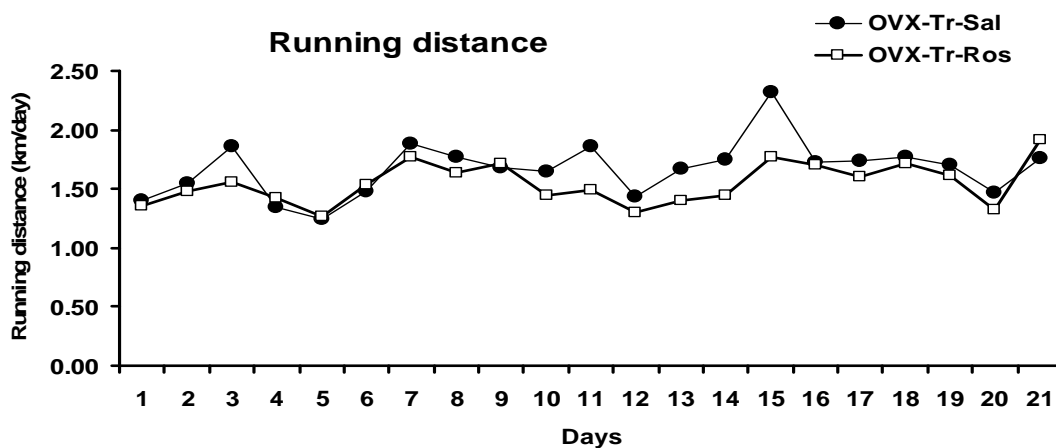

**S1C Fig. Running distance.** The average of daily running distance was  $1.67 \pm 0.16$  km for ovariectomized (Ovx) rats treated with saline (Sal); and  $1.54 \pm 0.2$  km for Ovx rats treated with rosuvastatin (Ros). The activity of Ovx rats treated with Ros showed a tendency to

decrease (not statistically significant) when compared to Ovx rats treated with saline. **Ovx-Tr-Sal**, Ovx trained rats treated with saline; and **Ovx-Tr-Ros**, Ovx trained rats treated with Ros.

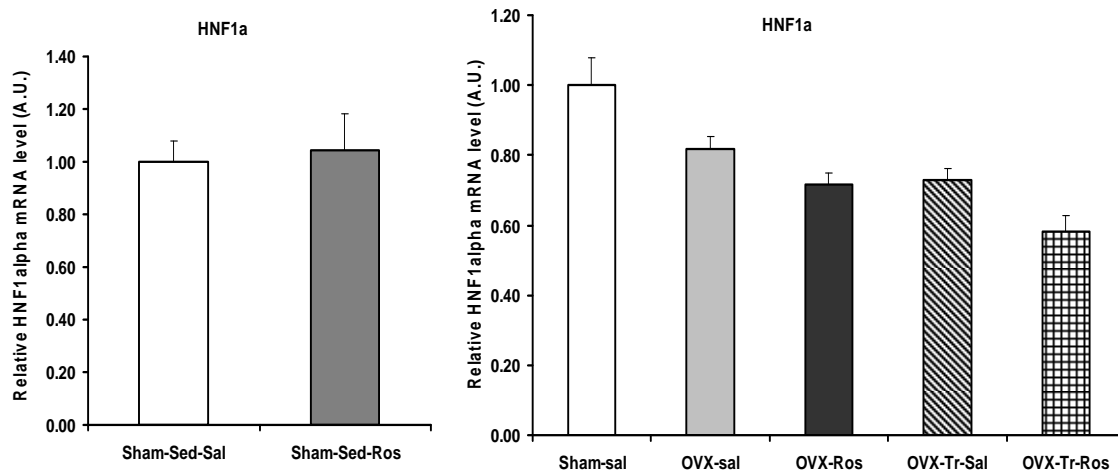

**S1D Fig. Liver mRNA expression of HNF1a.** Liver mRNA expression of hepatocyte nuclear factor (HNF1a) was not induced following Ros treatment both in Sham and Ovx rats.
